1 **A specific non-bisphosphonate inhibitor of the bifunctional farnesyl/geranylgeranyl**  
2 **diphosphate synthase in malaria parasites**

3  
4 Jolyn E. Gisselberg<sup>1</sup>, Zachary Herrera<sup>1</sup>, Lindsey Orchard<sup>4</sup>, Manuel Llinás<sup>4,5,6</sup>, and Ellen Yeh<sup>1,2,3\*</sup>

5  
6 <sup>1</sup>Department of Biochemistry, <sup>2</sup>Pathology, and <sup>3</sup>Microbiology and Immunology, Stanford  
7 Medical School, Stanford University, Stanford, CA 94305, USA

8  
9 <sup>4</sup>Department of Biochemistry & Molecular Biology, <sup>5</sup>Department of Chemistry and <sup>6</sup>Huck  
10 Center for Malaria Research, Pennsylvania State University, University Park, PA 16802

11  
12  
13  
14  
15 \*Corresponding author and lead contact: [ellenyeh@stanford.edu](mailto:ellenyeh@stanford.edu)

## 18 **Summary**

19 Isoprenoid biosynthesis is essential for *Plasmodium falciparum* (malaria) parasites and contains  
20 multiple validated antimalarial drug targets, including a bifunctional farnesyl and geranylgeranyl  
21 diphosphate synthase (FPPS/GGPPS). We identified MMV019313 as an inhibitor of  
22 *Pf*FPPS/GGPPS. Though *Pf*FPPS/GGPPS is also inhibited by a class of bisphosphonate drugs,  
23 MMV019313 has significant advantages for antimalarial drug development. MMV019313 has  
24 superior physicochemical properties compared to charged bisphosphonates that have poor  
25 bioavailability and strong bone affinity. We also show that it is highly selective for  
26 *Pf*FPPS/GGPPS and showed no activity against human FPPS or GGPPS. Inhibition of  
27 *Pf*FPPS/GGPPS by MMV019313, but not bisphosphonates, was disrupted in an S228T variant,  
28 demonstrating that MMV019313 and bisphosphonates have distinct modes-of-inhibition against  
29 *Pf*FPPS/GGPPS. Altogether MMV019313 is the first specific, non-bisphosphonate inhibitor of  
30 *Pf*FPPS/GGPPS. Our findings uncover a new small molecule binding site in this important  
31 antimalarial drug target and provide a promising starting point for development of *Plasmodium*-  
32 specific FPPS/GGPPS inhibitors.

33

34 **Keywords: malaria; drug discovery; and high-throughput screening; non-bisphosphonate**  
35 **inhibitor**

36

## 37 **Introduction**

38 There is an urgent need for antimalarials with novel mechanisms-of-action to circumvent  
39 resistance to frontline drugs. The biosynthesis of cellular isoprenoids is an essential process in  
40 *Plasmodium* parasites that cause malaria. A number of antimalarial compounds target enzymes

41 in isoprenoid biosynthetic pathways leading to parasite growth inhibition. First, *Plasmodium*  
42 parasites depend on the 7-enzyme prokaryotic 2-C-methyl-D-erythritol 4-phosphate (MEP)  
43 pathway in its plastid organelle, the apicoplast, to produce isopentenyl pyrophosphate (IPP) and  
44 its isomer dimethylallyl pyrophosphate (DMAPP) (Jomaa et al., 1999). IPP and DMAPP are the  
45 C5 building blocks for all isoprenoids. The antibiotic fosmidomycin inhibits the MEP enzyme,  
46 Dxr/IspC, in both bacteria and *Plasmodium* parasites (Jomaa et al., 1999).

47         Second, at least three isoprenoid synthases (PF3D7\_1128400.1, PF3D7\_0202700,  
48 PF3D7\_0826400) catalyze the condensation of IPP and DMAPP into longer prenyl chains (Artz  
49 et al., 2011; Jordão et al., 2013; Tonhosolo et al., 2005). In particular, farnesyl pyrophosphate  
50 synthase (FPPS) and geranylgeranyl pyrophosphate synthase (GGPPS) are key branch point  
51 enzymes that synthesize C15 and C20 prenyl chains, respectively, for multiple downstream  
52 enzymes. In *Plasmodium* parasites, these reactions are catalyzed by a single bifunctional  
53 enzyme, the farnesyl/geranylgeranyl diphosphate synthase (Artz et al., 2011; Jordão et al., 2013).  
54 Nitrogen-containing bisphosphonates, blockbuster drugs which inhibit human FPPS, also inhibit  
55 the bifunctional *Plasmodium* FPPS/GGPPS (Ghosh et al., 2004; Jordão et al., 2011; Michael B  
56 Martin et al., 2001; No et al., 2012; Singh et al., 2010).

57         Finally, prenyl chains are cyclized and/or conjugated to small molecule and protein  
58 scaffolds by a variety of prenyltransferases to biosynthesize final isoprenoid products required  
59 for parasite growth and replication. Tetrahydroquinolines (THQ) have been shown to potently  
60 inhibit the *Plasmodium* protein farnesyltransferase (Eastman et al., 2005; 2007; Nallan et al.,  
61 2005). Other inhibitors may interfere with isoprenoid biosynthesis indirectly by disrupting  
62 transporters that supply starting substrates or export products or blocking pathways that provide  
63 cofactors for isoprenoid biosynthetic enzymes.

64           Importantly fosmidomycin, bisphosphonates, and tetrahydroquinolines have all shown  
65 efficacy in mouse models of malaria infection, validating the key importance of isoprenoid  
66 biosynthesis as an antimalarial drug target (Jomaa et al., 1999; Nallan et al., 2005; No et al.,  
67 2012; Singh et al., 2010). Fosmidomycin is currently being tested in human clinical trials, while  
68 a THQ lead candidate was investigated in preclinical studies (Fernandes et al., 2015; Nallan et  
69 al., 2005). However, novel chemical scaffolds that disrupt isoprenoid biosynthetic pathways in  
70 *Plasmodium* remain desirable to overcome unfavorable drug properties of these known  
71 inhibitors. For example, bisphosphonates avidly bind bone mineral, and both fosmidomycin and  
72 THQs have short half-lives *in vivo* (Sinigaglia et al., 2007; Tsuchiya et al., 1982; Van Voorhis et  
73 al., 2007).

74           In 2011 the Medicine for Malaria Venture (MMV) distributed the Open-Access Malaria  
75 Box to accelerate antimalarial drug discovery (Spangenberg et al., 2013). The Malaria Box  
76 consists of 400 structurally diverse compounds, curated from >20,000 hits generated from large-  
77 scale screens, that inhibit the growth of blood-stage *Plasmodium falciparum* parasites (Gamo et  
78 al., 2010; Guiguemde et al., 2010; Rottmann et al., 2010). A major goal of sharing these  
79 compounds was to facilitate elucidation of their antimalarial mechanism-of-action and open new  
80 classes of validated chemical scaffolds and drug targets. Compounds that disrupt isoprenoid  
81 metabolism can be detected by “rescue” of their growth inhibition upon supplementation of  
82 isoprenoids in the growth media (Yeh and Derisi, 2011). Previously, we and two other groups  
83 screened the Malaria Box for compounds whose growth inhibition were rescued by addition of  
84 IPP and identified MMV008138 (Bowman et al., 2014; Wu et al., 2015). We and our  
85 collaborators demonstrated that MMV008138 inhibits IspD, an enzyme in the MEP pathway that  
86 produces IPP (Wu et al., 2015).

87           Using a quantitative high-throughput screen (qHTS), we report a second compound in the  
88 Malaria Box, MMV019313, that shows an IPP rescue phenotype but was not identified in  
89 screens performed by other groups (Bowman et al., 2014; DeRisi, 2014; Van Voorhis et al.,  
90 2016). We demonstrate that the target of MMV019313 is the *P. falciparum* FPPS/GGPPS, a  
91 cytosolic isoprenoid synthase that utilizes IPP and the key branch point enzyme in isoprenoid  
92 biosynthesis in parasites. MMV019313 represents the first new class of non-bisphosphonate  
93 inhibitors of *Pf*FPPS/GGPPS.

94

## 95 **Results**

96

### 97 **A quantitative high-throughput screen (qHTS) for growth and IPP rescue identifies**

### 98 **MMV019313 as an inhibitor of isoprenoid biosynthesis**

99           Previous IPP rescue screens of the Malaria Box tested compounds at a single, high  
100 concentration  $>5 \mu\text{M}$  (Bowman et al., 2014; DeRisi, 2014; Van Voorhis et al., 2016). While  
101 testing compounds at a single concentration is useful for identifying phenotypes that occur at a  
102 threshold concentration (e.g. growth inhibition), growth rescue is expected to occur within a  
103 specific range of concentrations. For example, doxycycline inhibits *P. falciparum* growth with an  
104  $\text{EC}_{50} = 0.3 \mu\text{M}$  that increases to  $3.2 \mu\text{M}$  upon addition of IPP (Yeh and Derisi, 2011). At  
105 concentrations  $<0.3 \mu\text{M}$ , doxycycline does not cause growth inhibition. However, at  
106 concentrations  $>3.2 \mu\text{M}$ , it is no longer specific for its target and causes growth inhibition  
107 through additional targets that cannot be IPP rescued. Therefore the concentration range in which  
108 IPP rescue can be observed is greater than the  $\text{EC}_{50}$  of the compound for its specific, IPP-  
109 rescuable target but less than that for any nonspecific targets.

110 To increase the sensitivity for detecting IPP chemical rescue, we screened the Malaria  
111 Box for growth inhibition of blood-stage *P. falciparum* in the presence and absence of IPP over  
112 8-12 drug concentrations from 0.01-27  $\mu\text{M}$  (Table S1). Of 397 compounds tested (3 compounds  
113 were not available), 383 showed growth inhibition at  $\leq 27 \mu\text{M}$ . Initial hits showing IPP rescue of  
114 growth inhibition at one or more drug concentrations were commercially sourced and retested.  
115 Along with the previously reported compound, MMV008138, we confirmed a second compound  
116 in the Malaria Box showing an IPP rescue phenotype, MMV019313 (Figure 1A). MMV019313  
117 inhibited *P. falciparum* growth measured in a single replication cycle with  $\text{EC}_{50}=268 \text{ nM}$  (250-  
118 289 nM) in the absence of IPP; in the presence of IPP (200  $\mu\text{M}$ ), the  $\text{EC}_{50}$  was over 13-fold more  
119 at 3.6  $\mu\text{M}$  (3.2-4.0  $\mu\text{M}$ ) (Figure 1B). Notably, at concentrations  $>3.6 \mu\text{M}$ , MMV019313 inhibits a  
120 nonspecific target that can no longer be IPP rescued, which explains why it was not identified in  
121 previous screens.

122 An unusual feature of blood-stage *Plasmodium* is that IPP can rescue complete loss of the  
123 apicoplast, the plastid organelle which houses the MEP pathway, since production of IPP is the  
124 only essential function of the apicoplast. Compounds like doxycycline that disrupt apicoplast  
125 biogenesis cause growth inhibition rescued by IPP and result in parasites lacking an apicoplast  
126 (Yeh and Derisi, 2011). In contrast, inhibitors of isoprenoid biosynthesis, like fosmidomycin and  
127 MMV008138, cause growth inhibition rescued by IPP with an intact apicoplast (Amberg-  
128 Johnson et al., 2017). We determined whether MMV019313 disrupted the biogenesis of the  
129 apicoplast. Both the replication of the apicoplast genome and import of an apicoplast-targeted  
130 GFP were intact in MMV019313-treated and IPP-rescued parasites (Figure S1) (Yeh and Derisi,  
131 2011). Altogether MMV019313 causes growth inhibition rescued by IPP with no defect in

132 apicoplast biogenesis, suggesting that, like fosmidomycin and MMV008138, MMV019313  
133 blocks isoprenoid biosynthesis (Wu et al., 2015).

134

135 **MMV019313-resistant parasites contain a mutation in the farnesyl/geranylgeranyl**  
136 **diphosphate synthase**

137       Though metabolomic profiling of MMV019313 has been performed, isoprenoid  
138 intermediates were not examined so a specific disruption of these pathways could not be inferred  
139 (Allman et al., 2016; Creek et al., 2016). Instead to gain further insight into the mechanism-of-  
140 action of MMV019313, we identified mutations that confer resistance to MMV019313. Our  
141 initial attempt to select drug-resistant parasites from a bulk culture of  $10^{10}$  parasites was not  
142 successful, though this same protocol was effective in selecting drug resistance against  
143 MMV008138 when performed in parallel (Wu et al., 2015). Therefore, we turned to chemical  
144 mutagenesis to increase the likelihood of selecting MMV019313-resistant parasites. Chemical  
145 mutagenesis followed by whole genome sequencing to identify mutations has been successfully  
146 employed to perform phenotypic screens in *T. gondii* but has not commonly been used in  
147 *Plasmodium* parasites (Desai et al., 2005; Farrell et al., 2014; Inselburg, 1984; 1985). We treated  
148  $10^8$  *P. falciparum* W2 parasites with sub-lethal doses of ethyl methanesulfonate (EMS), an  
149 alkylating agent. Because EMS is unstable, we tested a fresh batch of mutagen immediately prior  
150 to treatment in a standard parasite growth inhibition assay to determine its  $EC_{50}$ . We then  
151 selected the  $EC_{50}$  (2.025 mM) as the highest EMS concentration used and tested several lower  
152 concentrations by serially diluting 3-fold. These relatively low concentrations were selected to  
153 maximize the frequency of drug-resistant mutations while minimizing lethal mutations that  
154 would result in a smaller pool of starting parasites or the presence of nonspecific passenger

155 mutations that would confound identification of causative mutations during whole genome  
156 analysis. Following mutagenesis, parasites were continuously selected with a dose of  
157 MMV019313 equal to its  $EC_{75}$  in the presence of IPP for 32 days before removal of the drug.  
158 This concentration was chosen to maximize selection pressure for developing resistance in the  
159 IPP-rescuable target, while minimizing that for developing resistance in nonspecific targets.

160 Resistant parasites emerged in all mutagenized cultures one week after drug removal. In  
161 these resistant populations, MMV019313 showed  $EC_{50}$  values that ranged from 3-9-fold greater  
162 than that observed in the initial susceptible population. Growth inhibition of two MMV019313-  
163 resistant populations which showed the highest levels of resistance at the lowest EMS  
164 concentrations used (8.3  $\mu$ M and 25  $\mu$ M, designated 019313R1 and 019313R2 respectively) are  
165 shown in Figure 2A. Significantly the  $EC_{50}$  of MMV019313 in 019313R1 and 019313R2 was  
166 similar to that observed in susceptible strains in the presence of IPP, and growth inhibition could  
167 no longer be rescued by addition of IPP (Figure S2). These results suggest that, as expected,  
168 019313R1 and 019313R2 populations were completely resistant to inhibition of its specific IPP-  
169 rescuable target but had not developed resistance to inhibition of additional nonspecific targets.  
170 This is the first example of using chemical mutagenesis to aid selection of drug-resistant  
171 parasites in *P. falciparum*.

172 019313R1, 019313R2, and their respective mutagenized parent strains used to initiate  
173 drug selection, WT1 and WT2, were subjected to whole-genome sequencing. Comparison of the  
174 resistant and parent genome sequences identified a single nucleotide variant (SNV) common to  
175 both resistance populations, which was present in 100% of reads in 019313R1 and 63% of reads  
176 in 019313R2 but not present in either susceptible parent genomes (Table 1). No other SNV were  
177 detected at >40% prevalence in either resistant populations relative to the corresponding parent



178 populations (Table S2). The identified SNV was a T-to-A mutation in the gene PF3D7\_1128400  
179 characterized as a bifunctional FPPS/GGPPS and resulted in a Ser228-to-Thr change in the  
180 protein (Figure 2B) (Artz et al., 2011; Jordão et al., 2013). IPP is a known substrate of the  
181 FPPS/GGPPS, and in the primary sequence Ser228 is adjacent to conserved KT residues and an  
182 Asp-rich region required for catalysis in all homologous FPPS and GGPPS enzymes (Figure 2C).  
183 *Pf*FPPS/GGPPS was a strong candidate for further validation as the molecular target of  
184 MMV019313.

185

### 186 **Overexpression and an S228T variant of *Pf*FPPS/GGPPS confers resistance to** 187 **MMV019313**

188 We determined whether overexpression of wildtype *Pf*FPPS/GGPPS was sufficient to  
189 confer resistance to MMV019313. A transgene encoding FPPS/GGPPS-GFP under the control of  
190 either the ribosomal L2 protein (*RL2*; PF3D7\_1132700) or calmodulin (*CaM*; PF3D7\_1434200)  
191 promoter was integrated into an engineered *attB* locus in Dd2<sup>attb</sup> parasites (Nkrumah et al.,  
192 2006). Expression of the CaM promoter is 10 to 50-fold greater across the life cycle than that of  
193 the RL2 promoter based on RNA-seq data, resulting in appreciably greater FPPS/GGPPS-GFP  
194 protein (Figure S3A) (Otto et al., 2010). Therefore, we compared the effect of no, moderate  
195 (RL2), and high (CaM) levels of FPPS/GGPPS-GFP overexpression on susceptibility to  
196 MMV019313. As shown in Figure 3A and Table S3, overexpression of FPPS/GGPPS-GFP  
197 results in a dose-dependent increase in the  $EC_{50}$  of MMV019313 with intermediate-level  
198 resistance to MMV019313 observed in the RL2-FPPS/GGPPS-GFP strain and high-level  
199 resistance observed in the CaM-FPPS/GGPPS-GFP strain. Notably growth inhibition by  
200 MMV019313 in the CaM-FPPS/GGPPS-GFP strain could no longer be rescued by IPP,

201 indicating that complete resistance to inhibition of the specific IPP-rescuable target had been  
202 achieved (Figure S3B).

203 We also determined whether the S228T variant of GGPPS confers MMV019313  
204 resistance. Initially we attempted to introduce the S228T mutation into the *fpps/ggpps* gene in the  
205 *P. falciparum* genome using CRISPR-Cas9 mutagenesis but were unable to recover mutant  
206 parasites. As an alternative, we overexpressed the FPPS/GGPPS(S228T)-GFP variant using the  
207 “moderate” RL2 promoter and compared its effect on MMV019313 susceptibility with that of  
208 the wild-type RL2-FPPS/GGPPS-GFP. Overexpression of the FPPS/GGPPS(S228T)-GFP  
209 variant, even at moderate levels, caused an 18-fold increase in the  $EC_{50}$  which did not increase  
210 further with IPP rescue, indicating that complete resistance to inhibition of the specific, IPP-  
211 rescuable target had been achieved (Figure 3B and S3C; Table S3). Because moderate  
212 overexpression of the S228T variant caused greater MMV019313 resistance than moderate  
213 overexpression of wildtype *Pf*FPPS/GGPPS, we conclude that the S228T variant is sufficient to  
214 confer resistance independent of overexpression. Altogether these results clearly demonstrated  
215 that the mechanism-of-action of MMV019313 is dependent on *Pf*FPPS/GGPPS.

216

### 217 **MMV019313 specifically inhibits the enzymatic activity of *Pf*FPPS/GGPPS**

218 To confirm that *Pf*FPPS/GGPPS is the molecular target of MMV019313, we directly  
219 measured MMV019313 inhibition in enzymatic assays. Consistent with a previous report,  
220 purified *Pf*FPPS/GGPPS catalyzed the production of both farnesyl(C15)-PP and  
221 geranylgeranyl(C20)-PP (Jordão et al., 2013). To measure the inhibitory effect of MMV019313,  
222 we determined its  $IC_{50}$  for FPP and GGPP production in two conditions. In the first “non-  
223 saturating” condition, substrate concentrations equaled  $K_M$  values (Figure S4), the concentration

224 at which the rate of reaction is half-maximal. In the second “ $k_{cat}$ ” condition, substrate  
225 concentrations were saturating and the rate of reaction was maximal. Measuring inhibitor effects  
226 in both “non-saturating” and “ $k_{cat}$ ” conditions increases the sensitivity for detecting different  
227 types of inhibitors (competitive, non-competitive, uncompetitive). We found the  $IC_{50}$  value was  
228 330 nM for FPP production under “non-saturating” conditions, comparable to its  $EC_{50}$  value in  
229 cellular growth inhibition assays (Figure 1B and S5). MMV019313 was identified by its IPP  
230 rescue phenotype in cell growth assays wherein addition of exogenous substrate increases  
231 enzymatic rates, indicating that physiological conditions are likely sub-saturating. Therefore its  
232  $IC_{50}$  value measured in sub-saturating condition is more relevant for comparison to its  $EC_{50}$  value  
233 for growth inhibition. Under “ $k_{cat}$ ” conditions,  $IC_{50}$  values were 2.0  $\mu$ M for FPP production and  
234 9.8  $\mu$ M for GGPP production (Figure 4A-B).

235         Since inhibition was detectable in both conditions, assays of mutant and human enzymes  
236 were performed at saturating conditions which gives higher signal-to-noise. Significantly  
237 MMV019313 at concentrations up to 200  $\mu$ M did not inhibit human FPPS or GGPPS activity,  
238 indicating that it was at least 100-fold selective for *Pf*FPPS/GGPPS over human homologs  
239 (Figure 4A-B; Table S3). In contrast, the most selective bisphosphonate identified by a previous  
240 study, BPH-703, showed only a 2.6-fold selectivity for *Pf*FPPS/GGPPS versus human FPPS and  
241 3.6-fold selectivity versus human GGPPS in enzymatic assays (Figure 4C-D; Table S3) (No et  
242 al., 2012).

243

#### 244 **MMV019313 binds a novel site on *Pf*FPPS/GGPPS, distinct from that of bisphosphonates**

245         The lack of inhibition of human FPPS and GGPPS by MMV019313 was intriguing since  
246 *Pf*FPPS/GGPPS is structurally related to human FPPS and GGPPS and all are inhibited by

247 bisphosphonates (No et al., 2012). Co-crystal structures have shown that bisphosphonates,  
248 zoledronate and its lipophilic analog BPH-703, bind in the allylic substrate (DMAPP, GPP, or  
249 FPP) site in the *Plasmodium vivax* FPPS/GGPPS homolog (No et al., 2012). This binding is  
250 similar to what is observed in bisphosphonate-mammalian FPPS complexes (Kavanagh et al.,  
251 2006; Rondeau et al., 2006; Yokoyama et al., 2015; Zhang et al., 2013). To determine whether  
252 MMV019313 and bisphosphonates share a common binding site, we compared the effect of the  
253 S228T variant on inhibition by MMV019313 and the bisphosphonate BPH-703. MMV019313  
254 and BPH-703 both inhibited wild-type *Pf*FPPS/GGPPS activity. However only MMV019313  
255 inhibition was decreased by over 10-fold in the S228T variant (Figure 4A-D). This difference in  
256 their *in vitro* enzyme inhibition was consistent with the effect on parasite growth inhibition, in  
257 which moderate overexpression of the S228T variant conferred resistance to MMV019313 but  
258 not BPH-703 (Figure S5). In addition, residue S228 is adjacent to the IPP binding site in the  
259 bisphosphonate-*Pv*FPPS/GGPPS structures and distal from the bound bisphosphonate. These  
260 results demonstrate that MMV019313 has a novel binding mode, distinct from the known allylic  
261 substrate site occupied by bisphosphonates, one which may confer its specificity for *Plasmodium*  
262 FPPS/GGPPS over human homologs.

263         Because our biochemical results indicated that MMV019313 binds a new site which is  
264 unique to *Pf*FPPS/GGPPS, we performed molecular docking calculations to evaluate the  
265 likelihood of MMV019313 binding at known small molecule binding sites in *Pf*FPPS/GGPPS.  
266 Three small molecule binding sites have been identified in FPPS and GPPS enzymes: 1) the  
267 allylic substrate binding site, which is also occupied by bisphosphonates, 2) the IPP binding site,  
268 and 3) an allosteric site identified in *Hs*FPPS (Jahnke et al., 2010). Because both the allylic  
269 substrate and IPP sites have been structurally characterized in *Pv*FPPS/GGPPS, we used the rigid

270 body docking program Glide to generate poses with MMV019313 bound to these sites and  
271 estimate the binding free energy of each pose (Friesner et al., 2004; 2006; Halgren et al., 2004).  
272 The binding affinity estimated for the MMV019313 poses were  $>10^8$  weaker than  
273 bisphosphonate at the allylic site and  $>10^5$  weaker than IPP at its site (Table S4). Therefore, the  
274 modeling suggests that MMV019313 is unlikely to bind either the allylic substrate or IPP site.  
275 We also attempted to dock MMV019313 into other potential binding pockets in the  
276 *Pv*FPPS/GGPPS apo structure but with inconclusive results.

277

## 278 **Discussion**

279 Farnesyl and geranylgeranyl diphosphate synthase (FPPS and GGPPS) are key branch  
280 point enzymes in isoprenoid biosynthesis. Human cells contain separate FPPS and GGPPS  
281 enzymes. An important class of clinical drugs, nitrogen-containing bisphosphonates, inhibits  
282 human FPPS in osteoclasts and block their function and proliferation (Kavanagh et al., 2006).  
283 Because osteoclasts are responsible for bone resorption, bisphosphonates are highly effective for  
284 treatment of osteoporosis and other bone remodeling diseases. Bisphosphonates are chemically  
285 stable analogs of inorganic pyrophosphate containing a P-C-P bond in place of the  
286 phosphodiester, which accounts for both its inhibition of FPPS (acting as an analog of the allylic  
287 diphosphate substrate) and its high selectivity for osteoclasts (depositing in bone mineral which  
288 is composed of calcium and phosphate). Unfortunately the charge state of bisphosphonates is a  
289 major liability in other therapeutic applications, as they are poorly bioavailable, rapidly cleared  
290 by the kidney, and do not achieve therapeutic levels in serum for treatment of non-bone diseases  
291 (Cremers et al., 2005; Jordão et al., 2011; Singh et al., 2010; Van Voorhis et al., 2016).

292 *Pf*FPPS/GGPPS, the molecular target of MMV019313 as demonstrated in this study,  
293 closely resembles mammalian FPPS enzymes in sequence, structure, and inhibition by  
294 bisphosphonates (Jordão et al., 2013; No et al., 2012). Like human FPPS, it is a central node in  
295 cellular isoprenoid biosynthesis vulnerable to drug inhibition (Artz et al., 2011; Kavanagh et al.,  
296 2006; Luckman et al., 1998). In *Plasmodium*, FPP and GGPP are required for the biosynthesis of  
297 prenylated proteins, the prenyl modification of ubiquinone, and other isoprenoid products, such  
298 that inhibition of *Pf*FPPS/GGPPS disrupts multiple cellular pathways (Chakrabarti et al., 2002;  
299 de Macedo et al., 2002; Gabriel et al., 2015; Tonhosolo et al., 2005; 2009). Previously lipophilic  
300 bisphosphonates modified with an alkyl chain to increase their cell permeability were shown to  
301 inhibit *Pv*FPPS/GGPPS homolog and clear both blood- and liver-stage *Plasmodium* parasites in  
302 mice infection models (No et al., 2012; Singh et al., 2010). Importantly, these results validated  
303 *Plasmodium* FPPS/GGPPS as an antiparasitic drug target for both acute malaria treatment and  
304 malaria chemoprophylaxis.

305 Our identification of MMV019313 further addresses two key hurdles in the development  
306 of *Pf*FPPS/GGPPS inhibitors as antimalarial drugs. First, MMV019313 represents the first non-  
307 bisphosphonate class of *Plasmodium* FPPS/GGPPS inhibitors with superior physicochemical  
308 properties. Many efforts have been made to develop modified bisphosphonates or non-  
309 bisphosphonate compounds as FPPS and/or GGPPS inhibitors for treatment of soft-tissue  
310 cancers and infectious diseases (Chen et al., 2013; Jahnke et al., 2010; Liu et al., 2014;  
311 Marzinik et al., 2015; Zhang et al., 2009). Unlike bisphosphonates, MMV019313 has drug-like  
312 physicochemical properties satisfying the Rule of 5 and does not need to mimic a charged  
313 diphosphate substrate to achieve FPPS/GGPPS inhibition (Van Voorhis et al., 2016). As a  
314 compound in the Malaria Box library, it has already been tested in a panel of bioactivity and

315 pharmacokinetic assays with encouraging results (Van Voorhis et al., 2016). Furthermore the  
316 results of >300 assays characterizing Malaria Box compounds as part of an innovative “open  
317 source” drug discovery effort by many groups will be a rich source of information (Allman et al.,  
318 2016; Paul et al., 2016; Ullah et al., 2017; Van Voorhis et al., 2016).

319         Second, MMV019313 has high selectivity for *Pf*FPPS/GGPPS over human FPPS and  
320 GGPPS, minimizing the potential for mechanism-based (e.g. “on-target”) toxicity. In fact, we  
321 could not detect any inhibition of human FPPS or GGPPS indicating selectivity at the enzymatic  
322 level of at least 100-fold. Consistent with this lack of enzymatic inhibition, MMV019313  
323 showed no cytotoxicity against a panel of 60 human cancer cell lines at 10  $\mu$ M (Van Voorhis et al.,  
324 2016). In contrast, the most selective bisphosphonate BPH-703 identified by No *et al* showed  
325 2.6-3.6-fold selectivity in our enzymatic assays (corresponding to a reported therapeutic index of  
326 193 in growth inhibition assays) (No et al., 2012). Our results suggest that MMV019313 binds a  
327 novel site in *Pf*FPPS/GGPPS that is either absent from or substantially different in the human  
328 homologs, which may explain its high selectivity. Altogether MMV019313 offers a distinct and  
329 promising starting point for development of antimalarial FPPS/GGPPS inhibitors, which  
330 circumvents the inherent liabilities of the bisphosphonate pharmacophore and greatly improves  
331 on their selectivity.

332         Our immediate priority is to obtain structures of the inhibitor-enzyme complex to aid in  
333 structure-based design of MMV019313 derivatives with higher potency, as well as discovery of  
334 additional chemical scaffolds that occupy this new binding site. A potential challenge is that the  
335 FPPS/GGPPS structure is dynamic during catalysis. For example, the human FPPS is known to  
336 undergo at least two critical conformational changes (Kavanagh et al., 2006): The first is from an  
337 “open” apo form to a “closed” conformation upon binding of the allylic substrate, which is

338 associated with drastically increased affinity for the allylic substrate (and bisphosphonates that  
339 mimic this substrate) as well as orders the IPP binding pocket. The second structural change  
340 occurs upon IPP binding and sequesters the active site from bulk solvent. Several attempts to  
341 obtain co-crystal structures of MMV019313 with *Pv*FPPS/GGPPS under conditions in which  
342 bisphosphonate-*Pv*FPPS/GGPPS crystals were obtained (presumed to correspond to the “closed”  
343 conformation) have been unsuccessful (personal communication, Dr. Raymond Hui). Additional  
344 crystallization conditions may require testing in the presence and absence of different allylic  
345 substrates and IPP, as their binding could affect the binding of MMV019313. Moreover the  
346 conformational dynamics of FPPS and GGPPS enzymes preclude straightforward interpretation  
347 of the mode-of-inhibition from conventional kinetic assays. Bisphosphonates that bind at the  
348 allylic substrate site show slow, tight binding with characteristics of irreversible inhibitors rather  
349 than classic competitive inhibitors (Dunford et al., 2008; Taylor, 2004). Indeed our preliminary  
350 assays indicate that MMV019313 also shows slow binding likely dependent on conformational  
351 changes.

352         Since the S228T variant distinguishes between MMV019313 and bisphosphonate binding  
353 to *Pv*FPPS/GGPPS, obtaining its structure to compare with wildtype FPPS/GGPPS will also offer  
354 clues to this new mode-of-inhibition. The resistance caused by the S228T variant could be  
355 explained by a direct contact between Ser228 and MMV019313 in a new small molecule binding  
356 pocket. But because the change from Ser to Thr is quite conservative, the addition of a methyl  
357 group, it seems more likely that Ser228 is involved in conformational dynamics important for  
358 catalysis. Structural analysis of this variant enzyme may reveal altered conformational states  
359 underlying the resistance to MMV019313.



360 Optimization of the bioactivity and pharmacokinetic properties of MMV019313  
361 derivatives will be priorities for their development as antimalarials. The luciferase-based  
362 enzymatic assays performed in our study are robust for detection of effective inhibitors and can  
363 be adapted to high-throughput screening of small molecule libraries (in contrast we found a  
364 commercially-available colorimetric assay was not sufficiently sensitive) (Crowther et al., 2011).  
365 Inhibitor-enzyme structures will greatly accelerate optimization for potency against the  
366 *Plasmodium* FPPS/GGPPS, while simultaneously minimizing binding to the human homologs.  
367 *P. falciparum* strains overexpressing wildtype or the S228T variant, generated during this study,  
368 can also be re-tooled as secondary cellular assays for on-target specificity. Increased potency  
369 against blood-stage parasites will likely improve its activity against liver stage which currently is  
370 not detectable at 5  $\mu$ M (Van Voorhis et al., 2016). Inhibition of isoprenoid biosynthesis by  
371 fosmidomycin, bisphosphonates, or MMV019313 has not been shown to block gametocyte  
372 development (Lell et al., 2003; Van Voorhis et al., 2016). The drug properties of MMV019313  
373 derivatives will be optimized in standard absorption-distribution-metabolism-excretion-toxicity  
374 (ADME-T) assays. For example, we found that while MMV019313 is stable to human liver  
375 microsomal enzymes ( $t_{1/2}$  > 159 min), its  $t_{1/2}$  in mouse liver microsomes was 4 min. This metabolic  
376 instability may account for a <1  $\mu$ M peak serum concentration following oral administration in  
377 mice and will need to be addressed before derivatives can be tested in mouse models of  
378 *Plasmodium* infection (Van Voorhis et al., 2016).

379 Finally, our study demonstrates two methodological improvements. First, we took  
380 advantage of a quantitative screen for IPP chemical rescue using a range of inhibitor  
381 concentrations, rather than a single high dose. The increased sensitivity allowed us to identify  
382 MMV019313, though it was missed in prior screens. It also permits the screen to be performed

383 with geranylgeraniol, which is significantly less costly than IPP, since so far all identified  
384 inhibitors that rescue with IPP also show at least a partial rescue of parasite growth inhibition  
385 with geranylgeraniol (Yeh and Derisi, 2011; Zhang et al., 2011). Second, we successfully  
386 identified a drug-resistant mutation in chemically mutagenized *Plasmodium* parasites to facilitate  
387 mechanism-of-action elucidation. Though the rate and type of mutations caused by EMS was not  
388 characterized in our experiments, in the related apicomplexan parasite, *Toxoplasma gondii* EMS  
389 preferentially mutated A/T residues with similar rates of transitions and transversions (Farrell et  
390 al., 2014). Notably our study identified a T-to-A transversion in *PfFPPS/GGPPS* in  
391 MMV019313-resistant parasites which were only selected after chemical mutagenesis.  
392 Characterization of the rate and type of mutations in *Plasmodium* parasites will facilitate  
393 selection and dosing of specific chemical mutagens to optimize phenotype selection and  
394 mutation identification by sequencing. Though limited, our experience suggests that the use of  
395 chemical mutagens will increase successful selection for drug resistance in *Plasmodium*  
396 parasites, which is the most common method to identify drug targets from phenotypic drug  
397 screens (Gamo et al., 2010; Guiguemde et al., 2010; Rottmann et al., 2010). The low frequency  
398 of *in vitro* MMV019313 resistance also indicates that clinical resistance will also be less frequent  
399 to MMV019313 and its derivatives.

400

#### 401 **Significance**

402 There is an urgent need for antimalarials with novel mechanisms-of-action to circumvent  
403 resistance to frontline drugs. Isoprenoid biosynthetic pathways are essential for *Plasmodium*  
404 (malaria) parasites and contain multiple validated drug targets. Using a chemical genetic  
405 approach from a phenotypic growth rescue screen to target identification, we identified a new

406 antimalarial compound that inhibits a key branchpoint enzyme in isoprenoid biosynthesis. Our  
407 compound has significant advantages over bisphosphonate inhibitors that inhibit the same drug  
408 target with improved drug properties and specificity for the *Plasmodium* enzyme over human  
409 homologs. Our findings uncover a new “druggable” site in this important antimalarial drug target  
410 and provide a chemical starting point for development of *Plasmodium*-specific FPPS/GGPPS  
411 inhibitors.

412

### 413 **Materials and Methods**

414 ***P. falciparum in vitro* cultures.** *Plasmodium falciparum* W2 (MRA-157) and Dd2<sup>attB</sup>  
415 (MRA-843) were obtained from MR4. Parasites were grown in human erythrocytes (2%  
416 hematocrit, obtained from the Stanford Blood Center) in RPMI 1640 media supplemented with  
417 0.25% Albumax II (GIBCO Life Technologies), 2 g/L sodium bicarbonate, 0.1 mM  
418 hypoxanthine, 25 mM HEPES (pH 7.4), and 50 µg/L gentamycin, at 37°C, 5% O<sub>2</sub>, and 5% CO<sub>2</sub>.  
419 For passage of drug-treated, IPP-rescued parasites, the media was supplemented with 5 µM drug  
420 and 200 µM IPP (Isoprenoids LC or NuChem). For comparison of growth between different  
421 treatment conditions, cultures were carried simultaneously and handled identically with respect  
422 to media changes and addition of blood cells

423

424 **Chemical handling.** Malaria Box compounds were received as 10 mM DMSO stocks in  
425 96-well plates and diluted three-fold manually in DMSO. Fosmidomycin was included in control  
426 wells. Two-fold serial dilutions of the 96-well plates were performed on Velocity11. Compound  
427 stocks stored in DMSO were diluted for growth assays. MMV019313 was purchased from  
428 ChemDiv Biotech.

429

430           **qHTS screen for IPP chemical rescue.** Growth assays were performed in 384-well clear  
431 bottom assay plates (E and K scientific, Santa Clara, CA). Drug (100-400 nL) was added directly  
432 to each well using PinTool (V&P Scientific) on a Sciclone ALH3000 (Caliper Sciences). Using  
433 the Titertek Multidrop 384, first 40  $\mu$ L of growth media with and without 375  $\mu$ M IPP was  
434 dispensed, followed by 10  $\mu$ L ring-stage *P. falciparum* D10 parasites (parasitemia 0.8% in 10%  
435 hematocrit) into 384-well plates using the Titertek Multidrop 384. The final assay consisted of  
436 50  $\mu$ L ring-stage cultures at 0.8% parasitemia/ 2% hematocrit and drug concentrations from  
437 0.01-26.7  $\mu$ M  $\pm$  300  $\mu$ M IPP. The plate was incubated at 37°C for 72 h. Parasites were lysed  
438 with 10  $\mu$ L 5mM EDTA, 1.6% Triton-X, 20mM Tris-HCl and 0.16% Saponin containing 0.1%  
439 Sybr Green I (Invitrogen). The plates were then incubated at -80 °C for 20 min and thawed at  
440 room temperature overnight in the dark. Fluorescence was detected using Flexstation II- 384.  
441 Compounds that showed IPP rescue of growth inhibition at 1 or more drug concentrations in the  
442 initial 384-well high-throughput screen were re-tested in a 96-well growth assay.

443

444           **Growth inhibition assays to determine EC<sub>50</sub> values.** *P. falciparum* cultures (125  $\mu$ L)  
445 were grown in 96-well plates containing serial dilution of drugs in triplicate. Media was  
446 supplemented with 200  $\mu$ M IPP as indicated. Growth was initiated with ring-stage parasites at  
447 1% parasitemia and 0.5% hematocrit. Plates were incubated for 72h. Growth was terminated by  
448 fixation with 1% formaldehyde and parasitized cells were stained with 50 nM YOYO-1  
449 (Invitrogen). Parasitemia was determined by flow cytometry. Data were analyzed by BD C6  
450 Accuri C-Sampler software and fitted to a sigmoidal dose-inhibition function  
451 (Inhibition=Bottom + (Top-Bottom)/(1+10<sup>^</sup>((LogIC50-[drug])\*HillSlope) by GraphPad Prism.

452

453 ***P. falciparum* mutagenesis and resistance selection.** Late-stage parasites were purified  
454 using a SuperMACS II separator (Miltenyi Biotec) and incubated in complete medium with 8.3 –  
455 2025  $\mu$ M ethyl methanesulfonate (EMS, 6 concentrations total) for 2 hours. The concentrations  
456 of EMS used were selected by determining the  $EC_{50}$  in 72h parasite growth inhibition assays.  
457 The highest concentration used for mutagenesis was equal to the  $EC_{50}$  in order to maximize the  
458 selection pressure. The mutagen was then serially diluted 1:3 to test lower concentrations that  
459 might give lower mutation rates and therefore a lower frequency of passenger mutations.  
460 Mutagenized parasites were washed and separated into wells of 10 mL total volume  
461 (approximately 10% parasitemia, 2 % HCT). MMV019313 drug selection was applied to one  
462 well for each mutagenesis condition at 600 nM (approximately  $EC_{75}$ ), while the other well was  
463 left untreated in order to serve as a control for whole genome sequencing. Parasites were fed  
464 daily for the first week and every 3 days thereafter. Each culture was split in half every 6 days in  
465 order to introduce fresh RBC. Drug pressure was maintained for 32 days, with no observable  
466 parasite growth. After 32 days of selection, half of the culture from each EMS condition was  
467 removed from drug pressure. In these cultures, parasites which showed resistance to  
468 MMV019313 by a standard drug assay were observable after 7 days at all EMS conditions used.  
469 The parasites treated with the two lowest concentrations of EMS were selected for whole  
470 genome sequencing.

471

472 **Whole Genome Sequencing.** *Plasmodium falciparum* strains were sequenced by  
473 Illumina sequencing as described previously (Straimer et al., 2012). Briefly, NEBNext DNA  
474 library reagents (NEB) and NEXTflex DNA barcode adapters (Bioo Scientific) were used to

475 prepare PCR-free libraries (Kozarewa et al., 2009). Eight whole genome gDNA libraries were  
476 multiplexed and spiked with 8% PhiX control. Single-end sequencing was performed across two  
477 lanes on an Illumina HiSeq 2500 system. Data was analyzed using tools available in the Galaxy  
478 platform (Blankenberg et al., 2010; Giardine et al., 2005; Goecks et al., 2010). Sequencing reads  
479 were mapped against the *P. falciparum* 3D7v.10.0 reference genome using the Burrows-Wheeler  
480 Alignment tool (Li and Durbin, 2009). Sequencing data was visualized using Integrative  
481 Genomics Viewer (IGV) (Robinson et al., 2011; Thorvaldsdóttir et al., 2013). Variants were  
482 called using Freebayes (Garrison and Marth) and filtered for Quality >100 and Read Depth >30  
483 using GATK tools (Van der Auwera et al., 2013). SnpEff was used to annotate the list of variants  
484 based on the *P. falciparum* 3D7v9.1 reference genome (Cingolani et al., 2012). Sequencing data  
485 have been deposited to the NCBI SRA ([www.ncbi.nlm.nih.gov/sra](http://www.ncbi.nlm.nih.gov/sra); SRP106479).

486

487 ***P. falciparum* Transfections.** An *E. coli* codon optimized version of *Pf*FPPS/GGPPS  
488 (PF3D7\_1128400) was designed and synthesized by GeneWiz. Quick change mutagenesis was  
489 used to mutate GGPPS serine 228 to a threonine in the pUC vector provided by GeneWiz. These  
490 constructs were then moved into the pLN transfection plasmid designed for Bxb1  
491 mycobacteriophage integrase system (Adjalley et al., 2010). The In-fusion cloning kit (Clontech)  
492 was used for all cloning. Restriction enzymes *AvrII* and *BsiWI* were used to linearize the pLN  
493 vector. GGPPS was designed to have a C-terminal GFP tag. All transgenes were driven with  
494 either the ribosomal L2 protein (RL2) promoter (PF3D7\_1132700) or the calmodulin (CaM)  
495 promoter (PF3D7\_1434200) as denoted.

496 Transfections were carried out as previously described (Spalding et al., 2010). Briefly,  
497 400  $\mu$ L fresh red blood cells were preloaded with 100  $\mu$ g of both pINT, which carries the

498 bacteriophage integrase, and pRL2, which carries the gene of interest and the blasticidin  
499 resistance cassette, using a BioRad Gene-Pulser Xcell Electroporator. Electroporation conditions  
500 were infinite resistance, 310 V, and 950  $\mu$ F using a 2 mm cuvette. Preloaded red blood cells were  
501 combined with 2.5 mL ~20% schizont Dd2<sup>attB</sup> parasites and allowed to recover for 2 days before  
502 selection pressure was applied. Transfected parasites were selected with 2.5  $\mu$ g/mL blasticidin  
503 are were detectable by thin smear within 15 days. Integration was confirmed by PCR and identity  
504 of the transgene was confirmed by sanger sequencing.

505

506 **Immunoblots.** Parasites expressing either ACP<sub>L</sub>-GFP or one of the FPPS/GGPPS  
507 constructs generated in this study were isolated by saponin lysis and resuspended in 1xNuPage  
508 LDS sample buffer (Invitrogen). Whole cell lysate was separated by SDS-PAGE using 4-12%  
509 Bis-Tris gels (Invitrogen) and transferred to nitrocellulose using a Trans Turbo-blot (BioRad).  
510 Membranes were blocked with 3% BSA, probed with 1:5,000 monoclonal anti-GFP JL-8  
511 (BioRad) overnight, washed, then probed with 1:10,000 IRDye 680LT goat-anti-mouse. The  
512 Western was imaged using a Odyssey Imager (LiCor Biosciences).

513

514 **Live microscopy.** Infected red blood cells were treated with Hoescht to stain the nucleus.  
515 Single z-stack images were collected on an epifluorescence Nikon eclipse.

516

517 **Quantative PCR.** Quantitative PCR was performed as previously published (Yeh and  
518 Derisi, 2011). Briefly, parasites from 200  $\mu$ L of culture were isolated by saponin lysis followed  
519 by PBS wash to remove extracellular DNA. DNA was purified using DNeasy Blood and Tissue  
520 kit (Qiagen). Primers were designed to target genes found on the apicoplast or nuclear

521 genome: *tufA* (apicoplast) 5'-GATATTGATTCAGCTCCAGAAGAAA-3' / 5'-  
522 ATATCCATTTGTGTGGCTCCTATAA-3' and *CHT1* (nuclear) 5'-  
523 TGTTTCCTTCAACCCCTTTT-3' / 5'-TGTTTCCTTCAACCCCTTTT-3'. Reactions contained  
524 template DNA, 0.15  $\mu$ M of each primer, and 0.75 $\times$  LightCycler 480 SYBR Green I Master mix  
525 (Roche). PCR reactions were performed at 56°C primer annealing and 65°C template extension  
526 for 35 cycles on a Lightcycler 6500 (Roche). For each time point, the apicoplast:nuclear genome  
527 ratio of the fosmidomycin-treated positive control, chloramphenicol-treated negative control, or  
528 MMV019313-treated experiment were calculated relative to that of an untreated control  
529 collected at the same time.

530

531 **Recombinant protein purification.** Full length constructs of *Pf*FPPS/GGPPS, *Hs*FPPS,  
532 and *Hs*GGPPS were cloned into pET28a with an n-terminal hexahistidine tag. The *P. falciparum*  
533 FPPS/GGPPS was codon optimized for expression in *E. coli* (GeneWiz). *Pf*FPPS/GGPPS was  
534 mutagenized (S228T) using quick change mutagenesis. When expressed in *E. coli*,  
535 *Pf*FPPS/GGPPS (wt and S228T) and *Hs*FPPS were toxic. Cultures were supplemented with 0.4%  
536 glucose and grown to OD<sub>600</sub> of 0.8-1 and induced with 0.5 mM IPTG. *Hs*GGPPS was grown  
537 without supplementation to an OD<sub>600</sub> of 0.8-1. All cultures were induced for 4 hours at 37 °C,  
538 then harvested. Cells were lysed in 20 mM HEPES pH 8.0, 150 mM NaCl, 2 mM MgCl<sub>2</sub>, and  
539 protease inhibitor cocktail using sonication. Cleared lysates were either mixed with Talon metal  
540 affinity resin (Clontech) or purified over 5 ml HisTrap columns (GE Healthcare). His tagged  
541 protein was purified with a single step purification eluting with buffer with 300 mM imidazole.  
542 Proteins were dialyzed to remove imidazole and flash frozen.

543



544 ***In vitro* FPPS/GGPPS assays.** FPPS/GGPPS activity was measured by monitoring  
545 pyrophosphate release using the Lonza PPLight kit under kinetic conditions. Drug and either 20  
546  $\mu\text{g/ml}$  *Pv*FPPS/GGPPS, 40  $\mu\text{g/ml}$  *Hs*GGPPS, or 100  $\mu\text{g/ml}$  *Hs*FPPS protein were incubated for  
547 30 min room temperature. The reaction was initiated by the addition of Lonza PPLight kit  
548 reaction mix and substrates. Saturating substrate conditions were 100  $\mu\text{M}$  GPP or FPP, and 200  
549  $\mu\text{M}$  IPP. Sub-saturation conditions were  $K_M$  conditions as shown in Figure S4. Luciferase  
550 activity was monitored over time using a BioTek plate reader. Reaction rates were calculated  
551 from the linear portion of the raw luminescence over time curves ( $R^2 > 0.9$ ). Data were fitted to a  
552 sigmoidal dose-inhibition function (Inhibition=Bottom + (Top-Bottom)/(1+10<sup>^((LogIC50-</sup>  
553 [drug])\*HillSlope) by GraphPad Prism software.

554  
555 **MMV019313 ligand docking.** Using a solved *Pv*FPPS/GGPPS structure (PDB: 3EZ3,  
556 zoledronate and IPP bound) as a receptor model protein preparation wizard was used to add back  
557 in missing hydrogens and side chains. All crystallographic waters were removed. Hydrogen  
558 bonds were calculated using Epik at pH 8 ( $\pm 1$ ). The protein structure was minimized using OPL3  
559 force field. MMV019313 was docked using glide to receptor grids generated from the relevant  
560 crystallized small molecules.

561

562

## 563 **Author Contributions**

564 JEG, ZH, LO, and EY conducted experiments. JEG, ZH, LO, ML, and EY were  
565 responsible for data analysis. JEG and EY designed experiments and wrote the paper. ML and  
566 EY supervised the project.

567

## 568 **Acknowledgements**

569 We are grateful to Medicines for Malaria Ventures (MMV) for providing the Malaria  
570 Box compounds and making this valuable library freely available, as well as GlaxoSmithKline  
571 for their screening efforts that first identified MMV019313 (TCMDC-123889). We would like to  
572 thank Dr. Susmitha Suresh for performing drug screens and Dr. Felice Kelly for advice on how  
573 to chemically mutagenize our parasites for resistance selection. We are grateful to Dr. James  
574 Dunford (University of Oxford) for advice in developing the *in vitro* enzyme activity assays. We  
575 also would like to acknowledge Dr. Wei Zhu and Professor Eric Oldfield (University of Illinois,  
576 Urbana-Champaign) for *in vitro* *P. vivax* GGPPS activity assays and providing BPH-703.  
577 Funding support for this project was generously provided by the Stanford Consortium for  
578 Innovation, Design, Evaluation and Action (C-IDEA), NIH 1K08AI097239 (EY), NIH  
579 1DP5OD012119 (EY), the Burroughs Wellcome Fund Career Award for Medical Scientists  
580 (EY), the Burroughs Wellcome Fund Investigators in Pathogenesis of Infectious Disease (PATH)  
581 Award (ML), and the Stanford School of Medicine Dean's Postdoctoral Fellowship (JEG). The  
582 authors declare no conflict of interest.

583

584

## 585 **References**

586

587 Adjalley, S.H., Lee, M.C.S., and Fidock, D.A. (2010). A method for rapid genetic integration  
588 into *Plasmodium falciparum* utilizing mycobacteriophage Bxb1 integrase. *Methods Mol. Biol.*  
589 *634*, 87–100.

590 Allman, E.L., Painter, H.J., Samra, J., Carrasquilla, M., and Llinás, M. (2016). Metabolomic  
591 Profiling of the Malaria Box Reveals Antimalarial Target Pathways. *Antimicrob. Agents*  
592 *Chemother.* *60*, 6635–6649.

593 Amberg-Johnson, K., Ganesan, S.M., Lorenzi, H.A., Niles, J.C., and Yeh, E. (2017). A first-in-

- 594 class inhibitor of parasite FtsH disrupts plastid biogenesis in human pathogens. bioRxiv 108910.
- 595 Artz, J.D., Wernimont, A.K., Dunford, J.E., Schapira, M., Dong, A., Zhao, Y., Lew, J., Russell,  
596 R.G.G., Ebetino, F.H., Oppermann, U., et al. (2011). Molecular characterization of a novel  
597 geranylgeranyl pyrophosphate synthase from *Plasmodium* parasites. *J. Biol. Chem.* *286*, 3315–  
598 3322.
- 599 Blankenberg, D., Kuster, Von, G., Coraor, N., Ananda, G., Lazarus, R., Mangan, M.,  
600 Nekrutenko, A., and Taylor, J. (2010). Galaxy: a web-based genome analysis tool for  
601 experimentalists. *Curr Protoc Mol Biol Chapter 19*, Unit19.10.1–Unit19.10.21.
- 602 Bowman, J.D., Merino, E.F., Brooks, C.F., Striepen, B., Carlier, P.R., and Cassera, M.B. (2014).  
603 Antiapicoplast and gametocytocidal screening to identify the mechanisms of action of  
604 compounds within the malaria box. *Antimicrob. Agents Chemother.* *58*, 811–819.
- 605 Chakrabarti, D., Da Silva, T., Barger, J., Paquette, S., Patel, H., Patterson, S., and Allen, C.M.  
606 (2002). Protein farnesyltransferase and protein prenylation in *Plasmodium falciparum*. *J. Biol.*  
607 *Chem.*
- 608 Chen, S.-H., Lin, S.-W., Lin, S.-R., Liang, P.-H., and Yang, J.-M. (2013). Moiety-linkage map  
609 reveals selective nonbisphosphonate inhibitors of human geranylgeranyl diphosphate synthase. *J*  
610 *Chem Inf Model* *53*, 2299–2311.
- 611 Cingolani, P., Patel, V.M., Coon, M., Nguyen, T., Land, S.J., Ruden, D.M., and Lu, X. (2012).  
612 Using *Drosophila melanogaster* as a Model for Genotoxic Chemical Mutational Studies with a  
613 New Program, SnpSift. *Front Genet* *3*, 35.
- 614 Creek, D.J., Chua, H.H., Cobbold, S.A., Nijagal, B., MacRae, J.I., Dickerman, B.K., Gilson,  
615 P.R., Ralph, S.A., and McConville, M.J. (2016). Metabolomics-Based Screening of the Malaria  
616 Box Reveals both Novel and Established Mechanisms of Action. *Antimicrob. Agents*  
617 *Chemother.* *60*, 6650–6663.
- 618 Cremers, S.C.L.M., Pillai, G., and Papapoulos, S.E. (2005).  
619 Pharmacokinetics/pharmacodynamics of bisphosphonates: use for optimisation of intermittent  
620 therapy for osteoporosis. *Clin Pharmacokinet* *44*, 551–570.
- 621 Crowther, G.J., Napuli, A.J., Gilligan, J.H., Gagaring, K., Borboa, R., Francek, C., Chen, Z.,  
622 Dagostino, E.F., Stockmyer, J.B., Wang, Y., et al. (2011). Identification of inhibitors for putative  
623 malaria drug targets among novel antimalarial compounds. *Mol. Biochem. Parasitol.* *175*, 21–29.
- 624 de Macedo, C.S., Uhrig, M.L., Kimura, E.A., and Katzin, A.M. (2002). Characterization of the  
625 isoprenoid chain of coenzyme Q in *Plasmodium falciparum*. *FEMS Microbiol. Lett.* *207*, 13–20.
- 626 DeRisi, J.L. (2014). UCSF DeRisi Lab MMV Box Apicoplast Screening (EMBL-EBI).
- 627 Desai, S.A., Alkhalil, A., Kang, M., Ashfaq, U., and Nguyen, M.-L. (2005). Plasmodial surface  
628 anion channel-independent phloridzin resistance in *Plasmodium falciparum*. *J. Biol. Chem.* *280*,  
629 16861–16867.

- 630 Dunford, J.E., Kwaasi, A.A., Rogers, M.J., Barnett, B.L., Ebetino, F.H., Russell, R.G.G.,  
631 Oppermann, U., and Kavanagh, K.L. (2008). Structure-activity relationships among the nitrogen  
632 containing bisphosphonates in clinical use and other analogues: time-dependent inhibition of  
633 human farnesyl pyrophosphate synthase. *J. Med. Chem.* *51*, 2187–2195.
- 634 Eastman, R.T., White, J., Hucke, O., Bauer, K., Yokoyama, K., Nallan, L., Chakrabarti, D.,  
635 Verlinde, C.L.M.J., Gelb, M.H., Rathod, P.K., et al. (2005). Resistance to a protein  
636 farnesyltransferase inhibitor in *Plasmodium falciparum*. *J. Biol. Chem.* *280*, 13554–13559.
- 637 Eastman, R.T., White, J., Hucke, O., Yokoyama, K., Verlinde, C.L.M.J., Hast, M.A., Beese,  
638 L.S., Gelb, M.H., Rathod, P.K., and Van Voorhis, W.C. (2007). Resistance mutations at the lipid  
639 substrate binding site of *Plasmodium falciparum* protein farnesyltransferase. *Mol. Biochem.*  
640 *Parasitol.* *152*, 66–71.
- 641 Farrell, A., Coleman, B.I., Benenati, B., Brown, K.M., Blader, I.J., Marth, G.T., and Gubbels,  
642 M.-J. (2014). Whole genome profiling of spontaneous and chemically induced mutations in  
643 *Toxoplasma gondii*. *BMC Genomics* *15*, 354.
- 644 Fernandes, J.F., Lell, B., Agnandji, S.T., Obiang, R.M., Bassat, Q., Kremsner, P.G., Mordmüller,  
645 B., and Grobusch, M.P. (2015). Fosmidomycin as an antimalarial drug: a meta-analysis of  
646 clinical trials. *Future Microbiol* *10*, 1375–1390.
- 647 Friesner, R.A., Banks, J.L., Murphy, R.B., Halgren, T.A., Klicic, J.J., Mainz, D.T., Repasky,  
648 M.P., Knoll, E.H., Shelley, M., Perry, J.K., et al. (2004). Glide: a new approach for rapid,  
649 accurate docking and scoring. 1. Method and assessment of docking accuracy. *J. Med. Chem.* *47*,  
650 1739–1749.
- 651 Friesner, R.A., Murphy, R.B., Repasky, M.P., Frye, L.L., Greenwood, J.R., Halgren, T.A.,  
652 Sanschagrin, P.C., and Mainz, D.T. (2006). Extra precision glide: docking and scoring  
653 incorporating a model of hydrophobic enclosure for protein-ligand complexes. *J. Med. Chem.*  
654 *49*, 6177–6196.
- 655 Gabriel, H.B., Silva, M.F., Kimura, E.A., Wunderlich, G., Katzin, A.M., and Azevedo, M.F.  
656 (2015). Squalenstatin is an inhibitor of carotenoid biosynthesis in *Plasmodium falciparum*.  
657 *Antimicrob. Agents Chemother.* *59*, 3180–3188.
- 658 Gamo, F.J., Sanz, L.M., Vidal, J., de Cozar, C., Alvarez, E., Lavandera, J.-L., Vanderwall, D.E.,  
659 Green, D.V.S., Kumar, V., Hasan, S., et al. (2010). Thousands of chemical starting points for  
660 antimalarial lead identification. *Nature* *465*, 305–310.
- 661 Garrison, E., and Marth, G. Haplotype-based variant detection from short-read sequencing.  
662 <https://arxiv.org/abs/2012>.
- 663 Ghosh, S., Chan, J.M.W., Lea, C.R., Meints, G.A., Lewis, J.C., Tovian, Z.S., Flessner, R.M.,  
664 Loftus, T.C., Bruchhaus, I., Kendrick, H., et al. (2004). Effects of bisphosphonates on the growth  
665 of *Entamoeba histolytica* and *Plasmodium* species in vitro and in vivo. *J. Med. Chem.* *47*, 175–  
666 187.

- 667 Giardine, B., Riemer, C., Hardison, R.C., Burhans, R., Elnitski, L., Shah, P., Zhang, Y.,  
668 Blankenberg, D., Albert, I., Taylor, J., et al. (2005). Galaxy: a platform for interactive large-scale  
669 genome analysis. *Genome Res.* *15*, 1451–1455.
- 670 Goecks, J., Nekrutenko, A., Taylor, J., Galaxy Team (2010). Galaxy: a comprehensive approach  
671 for supporting accessible, reproducible, and transparent computational research in the life  
672 sciences. *Genome Biol.* *11*, R86.
- 673 Guiguemde, W.A., Shelat, A.A., Bouck, D., Duffy, S., Crowther, G.J., Davis, P.H., Smithson,  
674 D.C., Connelly, M., Clark, J., Zhu, F., et al. (2010). Chemical genetics of *Plasmodium*  
675 *falciparum*. *Nature* *465*, 311–315.
- 676 Halgren, T.A., Murphy, R.B., Friesner, R.A., Beard, H.S., Frye, L.L., Pollard, W.T., and Banks,  
677 J.L. (2004). Glide: a new approach for rapid, accurate docking and scoring. 2. Enrichment factors  
678 in database screening. *J. Med. Chem.* *47*, 1750–1759.
- 679 Inselburg, J. (1984). Induction and selection of drug resistant mutants of *Plasmodium*  
680 *falciparum*. *Mol. Biochem. Parasitol.* *10*, 89–98.
- 681 Inselburg, J. (1985). Induction and isolation of artemisinin-resistant mutants of *Plasmodium*  
682 *falciparum*. *Am. J. Trop. Med. Hyg.* *34*, 417–418.
- 683 Jahnke, W., Rondeau, J.-M., Cotesta, S., Marzinzik, A., Pellé, X., Geiser, M., Strauss, A., Götte,  
684 M., Bitsch, F., Hemmig, R., et al. (2010). Allosteric non-bisphosphonate FPPS inhibitors  
685 identified by fragment-based discovery. *Nat. Chem. Biol.* *6*, 660–666.
- 686 Jomaa, H., Wiesner, J., Sanderbrand, S., Altincicek, B., Weidemeyer, C., Hintz, M., Türbachova,  
687 I., Eberl, M., Zeidler, J., Lichtenthaler, H.K., et al. (1999). Inhibitors of the nonmevalonate  
688 pathway of isoprenoid biosynthesis as antimalarial drugs. *Science* *285*, 1573–1576.
- 689 Jordão, F.M., Gabriel, H.B., Alves, J.M.P., Angeli, C.B., Bifano, T.D., Breda, A., de Azevedo,  
690 M.F., Basso, L.A., Wunderlich, G., Kimura, E.A., et al. (2013). Cloning and characterization of  
691 bifunctional enzyme farnesyl diphosphate/geranylgeranyl diphosphate synthase from  
692 *Plasmodium falciparum*. *Malar. J.* *12*, 184.
- 693 Jordão, F.M., Saito, A.Y., Miguel, D.C., de Jesus Peres, V., Kimura, E.A., and Katzin, A.M.  
694 (2011). *In vitro* and *in vivo* antiplasmodial activities of risedronate and its interference with  
695 protein prenylation in *Plasmodium falciparum*. *Antimicrob. Agents Chemother.* *55*, 2026–2031.
- 696 Kavanagh, K.L., Guo, K., Dunford, J.E., Wu, X., Knapp, S., Ebetino, F.H., Rogers, M.J.,  
697 Russell, R.G.G., and Oppermann, U. (2006). The molecular mechanism of nitrogen-containing  
698 bisphosphonates as antiosteoporosis drugs. *Proc. Natl. Acad. Sci. U.S.A.* *103*, 7829–7834.
- 699 Kozarewa, I., Ning, Z., Quail, M.A., Sanders, M.J., Berriman, M., and Turner, D.J. (2009).  
700 Amplification-free Illumina sequencing-library preparation facilitates improved mapping and  
701 assembly of (G+C)-biased genomes. *Nat. Methods* *6*, 291–295.
- 702 Lell, B., Ruangweerayut, R., Wiesner, J., Missinou, M.A., Schindler, A., Baranek, T., Hintz, M.,

- 703 Hutchinson, D., Jomaa, H., and Kremsner, P.G. (2003). Fosmidomycin, a novel  
704 chemotherapeutic agent for malaria. *Antimicrob. Agents Chemother.* *47*, 735–738.
- 705 Li, H., and Durbin, R. (2009). Fast and accurate short read alignment with Burrows-Wheeler  
706 transform. *Bioinformatics* *25*, 1754–1760.
- 707 Liu, J., Liu, W., Ge, H., Gao, J., He, Q., Su, L., Xu, J., Gu, L.-Q., Huang, Z.-S., and Li, D.  
708 (2014). Syntheses and characterization of non-bisphosphonate quinoline derivatives as new  
709 FPPS inhibitors. *Biochim. Biophys. Acta* *1840*, 1051–1062.
- 710 Luckman, S.P., Hughes, D.E., Coxon, F.P., Graham, R., Russell, G., and Rogers, M.J. (1998).  
711 Nitrogen-containing bisphosphonates inhibit the mevalonate pathway and prevent post-  
712 translational prenylation of GTP-binding proteins, including Ras. *J. Bone Miner. Res.* *13*, 581–  
713 589.
- 714 Marzinzik, A.L., Amstutz, R., Bold, G., Bourgier, E., Cotesta, S., Glickman, J.F., Götte, M.,  
715 Henry, C., Lehmann, S., Hartwig, J.C.D., et al. (2015). Discovery of Novel Allosteric Non-  
716 Bisphosphonate Inhibitors of Farnesyl Pyrophosphate Synthase by Integrated Lead Finding.  
717 *ChemMedChem* *10*, 1884–1891.
- 718 Michael B Martin, Joshua S Grimley, Jared C Lewis, Huel T Heath, III, Brian N Bailey, Howard  
719 Kendrick, Vanessa Yardley, Aura Caldera, Renee Lira, Julio A Urbina, et al. (2001).  
720 Bisphosphonates Inhibit the Growth of *Trypanosoma brucei*, *Trypanosoma cruzi*, *Leishmania*  
721 *donovani*, *Toxoplasma gondii*, and *Plasmodium falciparum*: A Potential Route to  
722 Chemotherapy. *J. Med. Chem.* *44*, 909–916.
- 723 Nallan, L., Bauer, K.D., Bendale, P., Rivas, K., Yokoyama, K., Hornéy, C.P., Pendyala, P.R.,  
724 Floyd, D., Lombardo, L.J., Williams, D.K., et al. (2005). Protein farnesyltransferase inhibitors  
725 exhibit potent antimalarial activity. *J. Med. Chem.* *48*, 3704–3713.
- 726 Nkrumah, L.J., Muhle, R.A., Moura, P.A., Ghosh, P., Hatfull, G.F., Jacobs, W.R., and Fidock,  
727 D.A. (2006). Efficient site-specific integration in *Plasmodium falciparum* chromosomes  
728 mediated by mycobacteriophage Bxb1 integrase. *Nat. Methods* *3*, 615–621.
- 729 No, J.H., de Macedo Dossin, F., Zhang, Y., Liu, Y.-L., Zhu, W., Feng, X., Yoo, J.A., Lee, E.,  
730 Wang, K., Hui, R., et al. (2012). Lipophilic analogs of zoledronate and risedronate inhibit  
731 *Plasmodium* geranylgeranyl diphosphate synthase (GGPPS) and exhibit potent antimalarial  
732 activity. *Proc. Natl. Acad. Sci. U.S.a.* *109*, 4058–4063.
- 733 Otto, T.D., Wilinski, D., Assefa, S., Keane, T.M., Sarry, L.R., Böhme, U., Lemieux, J., Barrell,  
734 B., Pain, A., Berriman, M., et al. (2010). New insights into the blood-stage transcriptome of  
735 *Plasmodium falciparum* using RNA-Seq. *Mol. Microbiol.* *76*, 12–24.
- 736 Paul, A.S., Moreira, C.K., Elsworth, B., Allred, D.R., and Duraisingh, M.T. (2016). Extensive  
737 Shared Chemosensitivity between Malaria and Babesiosis Blood-Stage Parasites. *Antimicrob.*  
738 *Agents Chemother.* *60*, 5059–5063.
- 739 Robinson, J.T., Thorvaldsdóttir, H., Winckler, W., Guttman, M., Lander, E.S., Getz, G., and

- 740 Mesirov, J.P. (2011). Integrative genomics viewer. *Nat. Biotechnol.* 29, 24–26.
- 741 Rondeau, J.-M., Bitsch, F., Bourgier, E., Geiser, M., Hemmig, R., Kroemer, M., Lehmann, S.,  
742 Ramage, P., Rieffel, S., Strauss, A., et al. (2006). Structural Basis for the Exceptional in vivo  
743 Efficacy of Bisphosphonate Drugs. *ChemMedChem* 1, 267–273.
- 744 Rottmann, M., McNamara, C., Yeung, B.K.S., Lee, M.C.S., Zou, B., Russell, B., Seitz, P.,  
745 Plouffe, D.M., Dharia, N.V., Tan, J., et al. (2010). Spiroindolones, a potent compound class for  
746 the treatment of malaria. *Science* 329, 1175–1180.
- 747 Singh, A.P., Zhang, Y., No, J.H., Docampo, R., Nussenzweig, V., and Oldfield, E. (2010).  
748 Lipophilic bisphosphonates are potent inhibitors of *Plasmodium* liver-stage growth. *Antimicrob.*  
749 *Agents Chemother.* 54, 2987–2993.
- 750 Sinigaglia, L., Varenna, M., and Casari, S. (2007). Pharmacokinetic profile of bisphosphonates  
751 in the treatment of metabolic bone disorders. *Clin Cases Miner Bone Metab* 4, 30–36.
- 752 Spalding, M.D., Allary, M., Gallagher, J.R., and Prigge, S.T. (2010). Validation of a modified  
753 method for Bxb1 mycobacteriophage integrase-mediated recombination in *Plasmodium*  
754 *falciparum* by localization of the H-protein of the glycine cleavage complex to the  
755 mitochondrion. *Mol. Biochem. Parasitol.* 172, 156–160.
- 756 Spangenberg, T., Burrows, J.N., Kowalczyk, P., McDonald, S., Wells, T.N.C., and Willis, P.  
757 (2013). The open access malaria box: a drug discovery catalyst for neglected diseases. *PLoS*  
758 *ONE* 8, e62906.
- 759 Straimer, J., Lee, M.C.S., Lee, A.H., Zeitler, B., Williams, A.E., Pearl, J.R., Zhang, L., Rebar,  
760 E.J., Gregory, P.D., Llinás, M., et al. (2012). Site-specific genome editing in *Plasmodium*  
761 *falciparum* using engineered zinc-finger nucleases. *Nat. Methods* 9, 993–998.
- 762 Taylor, K.B. (2004). Slow and Tight Inhibition. In *Enzyme Kinetics and Mechanisms*,  
763 (Dordrecht: Kluwer Academic Publishers), pp. 122–146.
- 764 Thorvaldsdóttir, H., Robinson, J.T., and Mesirov, J.P. (2013). Integrative Genomics Viewer  
765 (IGV): high-performance genomics data visualization and exploration. *Brief. Bioinformatics* 14,  
766 178–192.
- 767 Tonhosolo, R., D’Alexandri, F.L., de Rosso, V.V., Gazarini, M.L., Matsumura, M.Y., Peres, V.J.,  
768 Merino, E.F., Carlton, J.M., Wunderlich, G., Mercadante, A.Z., et al. (2009). Carotenoid  
769 biosynthesis in intraerythrocytic stages of *Plasmodium falciparum*. *J. Biol. Chem.* 284, 9974–  
770 9985.
- 771 Tonhosolo, R., D’Alexandri, F.L., Genta, F.A., Wunderlich, G., Gozzo, F.C., Eberlin, M.N.,  
772 Peres, V.J., Kimura, E.A., and Katzin, A.M. (2005). Identification, molecular cloning and  
773 functional characterization of an octaprenyl pyrophosphate synthase in intra-erythrocytic stages  
774 of *Plasmodium falciparum*. *Biochem. J.* 392, 117–126.
- 775 Tsuchiya, T., Ishibashi, K., Terakawa, M., Nishiyama, M., Itoh, N., and Noguchi, H. (1982).

- 776 Pharmacokinetics and metabolism of fosmidomycin, a new phosphonic acid, in rats and dogs.  
777 Eur J Drug Metab Pharmacokinet 7, 59–64.
- 778 Ullah, I., Sharma, R., Biagini, G.A., and Horrocks, P. (2017). A validated bioluminescence-  
779 based assay for the rapid determination of the initial rate of kill for discovery antimalarials. J.  
780 Antimicrob. Chemother. 72, 717–726.
- 781 Van der Auwera, G.A., Carneiro, M.O., Hartl, C., Poplin, R., Del Angel, G., Levy-Moonshine,  
782 A., Jordan, T., Shakir, K., Roazen, D., Thibault, J., et al. (2013). From FastQ data to high  
783 confidence variant calls: the Genome Analysis Toolkit best practices pipeline. Curr Protoc  
784 Bioinformatics 43, 11.10.1–10.33.
- 785 Van Voorhis, W.C., Adams, J.H., Adelfio, R., Ah Yong, V., Akabas, M.H., Alano, P., Alday, A.,  
786 Alemán Resto, Y., Alsibae, A., Alzualde, A., et al. (2016). Open Source Drug Discovery with  
787 the Malaria Box Compound Collection for Neglected Diseases and Beyond. PLoS Pathog. 12,  
788 e1005763.
- 789 Van Voorhis, W.C., Rivas, K.L., Bendale, P., Nallan, L., Hornéy, C., Barrett, L.K., Bauer, K.D.,  
790 Smart, B.P., Ankala, S., Hucke, O., et al. (2007). Efficacy, pharmacokinetics, and metabolism of  
791 tetrahydroquinoline inhibitors of *Plasmodium falciparum* protein farnesyltransferase.  
792 Antimicrob. Agents Chemother. 51, 3659–3671.
- 793 Wu, W., Herrera, Z., Ebert, D., Baska, K., Cho, S.H., Derisi, J.L., and Yeh, E. (2015). A  
794 chemical rescue screen identifies a *Plasmodium falciparum* apicoplast inhibitor targeting MEP  
795 isoprenoid precursor biosynthesis. Antimicrob. Agents Chemother. 59, 356–364.
- 796 Yeh, E., and Derisi, J.L. (2011). Chemical rescue of malaria parasites lacking an apicoplast  
797 defines organelle function in blood-stage *Plasmodium falciparum*. PLoS Biol. 9, e1001138.
- 798 Yokoyama, T., Mizuguchi, M., Ostermann, A., Kusaka, K., Niimura, N., Schrader, T.E., and  
799 Tanaka, I. (2015). Protonation State and Hydration of Bisphosphonate Bound to Farnesyl  
800 Pyrophosphate Synthase. J. Med. Chem. 58, 7549–7556.
- 801 Zhang, B., Watts, K.M., Hodge, D., Kemp, L.M., Hunstad, D.A., Hicks, L.M., and Odom, A.R.  
802 (2011). A second target of the antimalarial and antibacterial agent fosmidomycin revealed by  
803 cellular metabolic profiling. Biochemistry 50, 3570–3577.
- 804 Zhang, Y., Cao, R., Yin, F., Hudock, M.P., Guo, R.-T., Krysiak, K., Mukherjee, S., Gao, Y.-G.,  
805 Robinson, H., Song, Y., et al. (2009). Lipophilic bisphosphonates as dual  
806 farnesyl/geranylgeranyl diphosphate synthase inhibitors: an X-ray and NMR investigation. J.  
807 Am. Chem. Soc. 131, 5153–5162.
- 808 Zhang, Y., Zhu, W., Liu, Y.-L., Wang, H., Wang, K., Li, K., No, J.H., Ayong, L., Gulati, A.,  
809 Pang, R., et al. (2013). Chemo-Immunotherapeutic Anti-Malarials Targeting Isoprenoid  
810 Biosynthesis. ACS Med Chem Lett 4, 423–427.

811

812



813 **Tables**

814 **Table 1. Summary of mutations identified by whole genome sequencing**

| Gene ID <sup>a</sup> | Description <sup>b</sup>                      | Base Call <sup>c</sup> |    |     | AA change | Population | Read Number <sup>d</sup> |     | % <sup>e</sup> |      |
|----------------------|-----------------------------------------------|------------------------|----|-----|-----------|------------|--------------------------|-----|----------------|------|
|                      |                                               | Position               | WT | EMS |           |            | WT                       | R   | WT             | R    |
| PF3D7_1128400        | Geranylgeranyl pyrophosphate synthase (GGPPS) | 682                    | T  | A   | S228T     | 019313R1   | 219                      | 163 | 100            | 100  |
|                      |                                               |                        |    |     |           | 019313R2   | 186                      | 181 | 100            | 62.4 |

815 <sup>a</sup> PlasmoDB gene Identification number

816 <sup>b</sup> Basic gene description based on PlasmoDB functional assignments

817 <sup>c</sup> WT calls match 3D7 reference genome

818 <sup>d</sup> Read depth corresponding to WT call (IGV) and Mut call (SnpEff) respectively

819 <sup>e</sup> Percent of reads corresponding to WT call (IGV) and Mut call (SnpEff) respectively

820

821

822 **Figures and Figures legends**

823

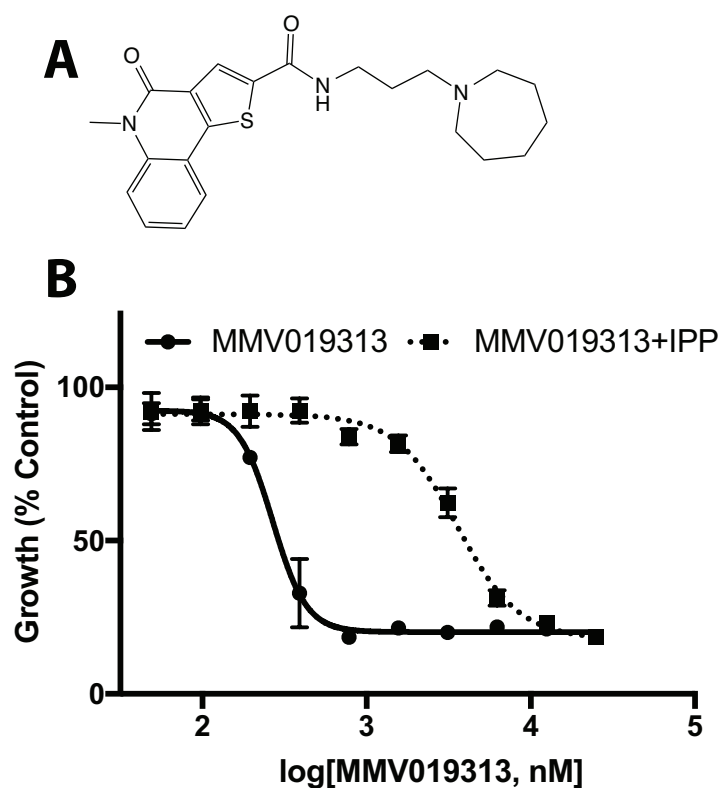

824

825

826 **Figure 1. IPP rescues growth inhibition by MMV019313. A.** The structure of MMV019313.

827 **B.** EC<sub>50</sub> curves in the absence (solid line) and presence (dotted line) of IPP. Parasitemia is

828 normalized to that of an untreated control. Results shown for experiments performed in

829 biological triplicate with technical duplicate. Shown plotted as mean ±SD.

830

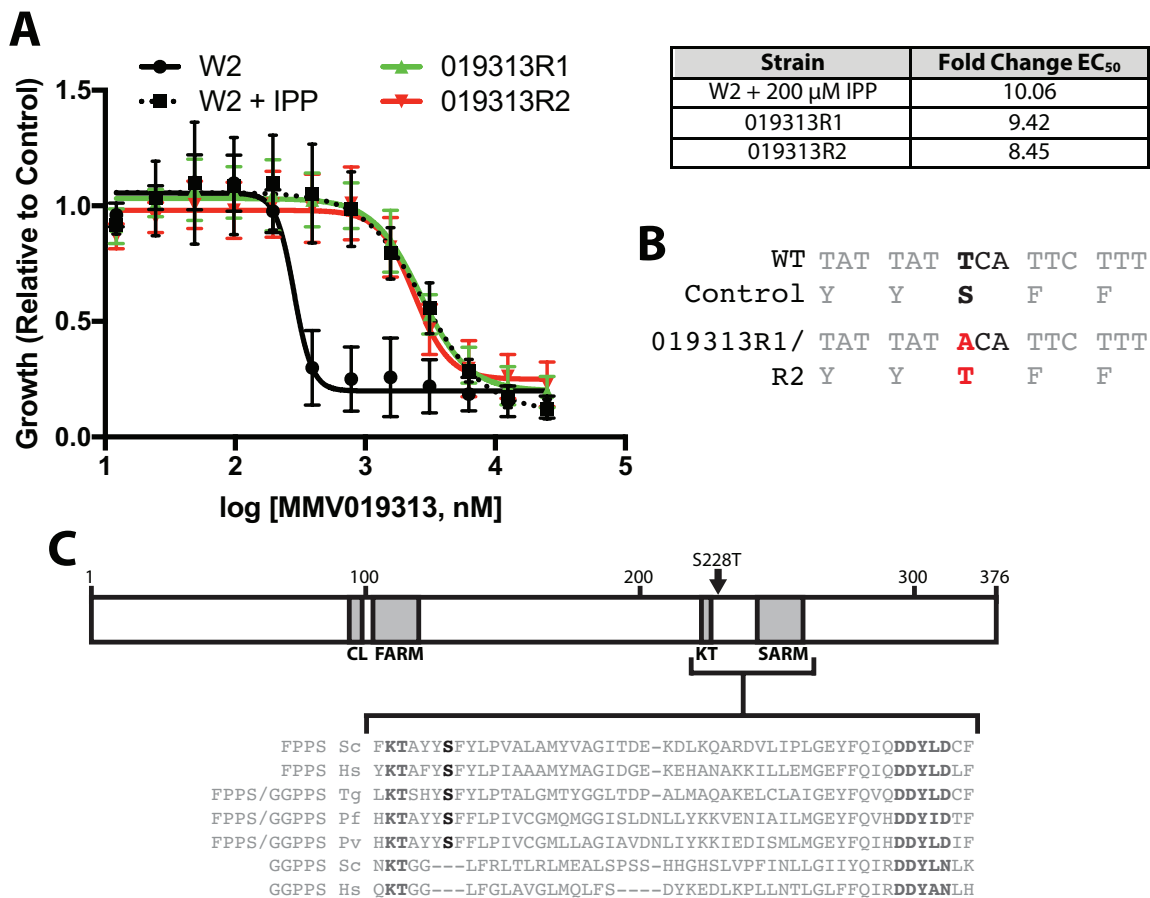

831  
832  
833  
834  
835  
836  
837  
838  
839  
840  
841  
842

**Figure 2. MMV019313-resistant parasites contain a mutation in the bifunctional farnesyl and geranylgeranyl diphosphate synthase.** **A.** EC<sub>50</sub> curves of parental W2 parasites alone (black, solid line) and with IPP supplementation (black, dotted line) and the two resistant populations (019313R1, red line, and 019313R2, green line) without IPP added. Fold change in EC<sub>50</sub> compared to W2 parasites is shown in the right. Results shown for experiments performed in biological triplicate with technical duplicate. Shown plotted as mean ±SD. **B.** Mutation determined by whole genome sequencing of resistant populations 019313R1 and 019313R2, highlighted in red **C.** Schematic of *Pf*FPPS/GGPPS protein. The S228T residue is highlighted in bold black while conserved KT and SARM residues are highlighted in bold grey and underlined.

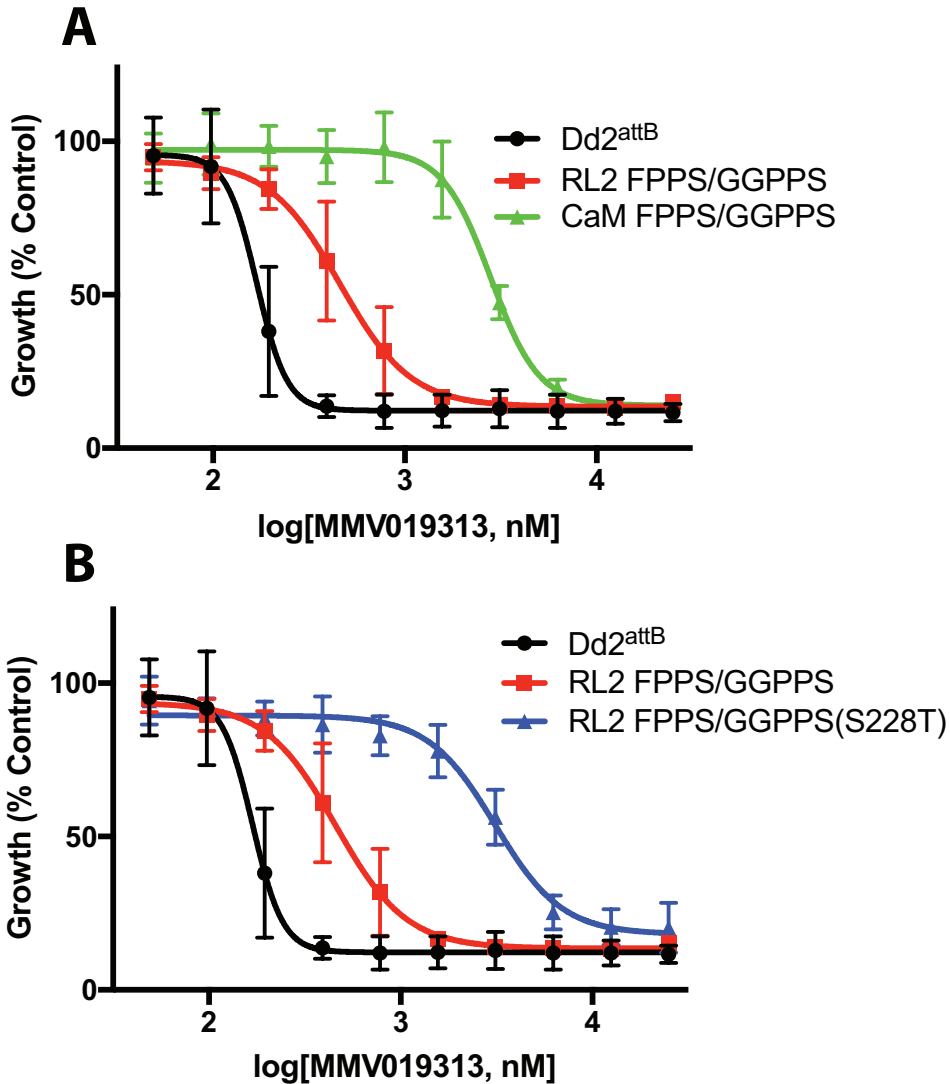

843  
844

845 **Figure 3. Overexpression of WT and an S228T variant of *Pf*FPPS/GGPPS confer resistance**  
846 **to MMV019313.** A. EC<sub>50</sub> curves of MMV019313 against the parental Dd2<sup>attB</sup> parasites (black)  
847 and parasites over-expressing FPPS/GGPPS-GFP under the RL2 (red) or CaM (green) promoter.  
848 B. EC<sub>50</sub> curves of MMV019313 against the parental Dd2<sup>attB</sup> parasites (black) and parasites over-  
849 expressing wild type (red) or mutant (S228T, blue) FPPS/GGPPS-GFP under the RL2 promoter.  
850 Results shown for experiments performed in biological duplicate with technical duplicate.  
851 Shown plotted as mean ±SD.  
852

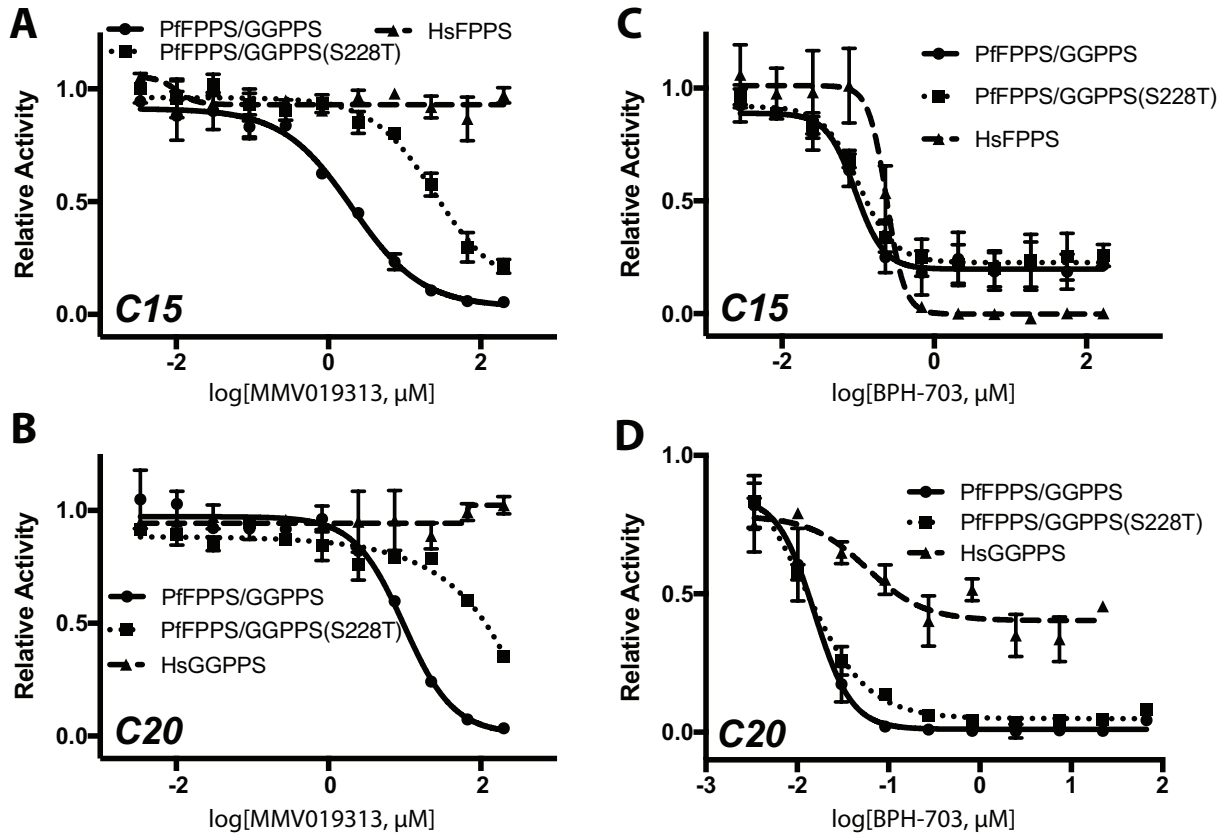

853  
 854  
 855  
 856  
 857  
 858  
 859  
 860  
 861  
 862  
 863

**Figure 4. MMV019313 has a specific and distinct mode-of-inhibition against purified *Pf*FPPS/GGPPS.** Dose-dependent inhibition of wild-type *Pf*FPPS/GGPPS (solid), *Pf*FPPS/GGPPS S228T variant (dotted), and either human FPPS or GGPPS (dashed) of **A.** FPP (C15) production by MMV019313, **B.** GGPP (C20) production by MMV010313, **C.** FPP (C15) production by BPH-703, and **D.** GGPP (C20) production by BPH-703. Partial inhibition of *Hs*GGPPS by BPH-703 was observed under  $k_{cat}$  conditions, while complete inhibition was observed under non-saturating conditions (Figure S5). Shown plotted as mean  $\pm$ SD.
